# Supplementary material
Source: PubMed Central journal article supplement (PMC2747218)
Supplement: 0905914106_0905914106SI.pdf [file 0905914106_0905914106SI.pdf]

# Supporting Information

Kulkarni et al. 10.1073/pnas.0905914106

## SI Text

**Sequence Analysis of Fpo Subunits from *Methanosarcina* Species.** The input module, FpoF, has been proposed to oxidize  $F_{420}H_2$  and transfer electrons via enzyme-bound flavin adenine dinucleotide to 2 tetranuclear iron-sulfur [4Fe-4S] clusters that are bound to FpoF by cysteine-containing motifs,  $C^{14}XXC^{17}XXC^{20}XXXC^{24}P$  and  $C^{55}XXC^{58}XXC^{61}XXXC^{65}P$ , which are conserved in all 3 *Methanosarcina* FpoF subunits (Fig. S3) (1). These subunits share 86% to 89% amino acid identity (Table S1). Interestingly, the genomic location of *fpoF* is conserved in all 3 species, such that it is located between genes encoding methylenetetrahydro-sarcinapterin reductase (*mer*) and a putative cytidyltransferase (Fig. S1) (2). Although it is unknown if the 3 genes constitute an operon, the *mer-fpoF* intergenic region in all 3 *Methanosarcina* species includes multiple polyT tracts, which are known to signal transcription termination in Archaea (Fig. S4) (3).

Electrons from FpoF probably are channeled through the membrane-associated module of Fpo, Fpo BCDI, via 3 [4Fe-4S] clusters in FpoI and FpoB. Of these [4Fe-4S] clusters, 2 are bound to FpoI by motifs  $C^{44}XXC^{47}XXC^{50}XXXC^{54}P$  and  $C^{84}XXC^{87}XXC^{90}XXXC^{94}P$  (Fig. S3) and are assumed to be analogous to the N6a and N6b clusters of Nuo of *Escherichia coli*. On the other hand, the third [4Fe-4S] cluster has been compared with the N2 cluster of Nuo of *E. coli* and probably binds FpoB via the motif  $C^{61}C^{62}XXEX_{60}C^{126}X_{29}C^{156}P$ . All 3 [4Fe-4S] cluster-binding motifs are well conserved in the 3 *Methanosarcina* FpoI and FpoB subunits (1, 4, 5). These subunits share a high degree of amino acid sequence identity (>83%) (Table S1). Although the amphipathic subunits FpoC and FpoD do not have well-defined functions, FpoD has been implicated in binding methanophenazine aromatic rings via the conserved Glycine<sup>367</sup> residue. FpoD also contains 2 conserved cysteines, C<sup>70</sup> and C<sup>368</sup>, which are reminiscent of its ancestral protein, the large subunit of [NiFe] hydrogenases that harbors these cysteines as Ni-binding ligands (Fig. S3) (4). Both the FpoC and FpoD subunits from the 3 *Methanosarcina* species show significant amino acid sequence identity of 80% to 90% (Table S1). Another Fpo subunit that has eluded characterization is the hydrophilic FpoO subunit. In *M. mazei*, FpoO contains a [2Fe-2S] binding motif,  $SC^{58}RXGXC^{63}SXC^{66}XXKX_{24}C^{94}$  (Fig. S3) (1). The 4 cysteines of the motif that coordinate the iron-sulfur center are conserved in the other 2 *Methanosarcina* species. However, *M. acetivorans* is missing the Serine<sup>64</sup> residue, and *M. barkeri* lacks the Glycine<sup>61</sup> and Serine<sup>64</sup> residues. *M. acetivorans* has an additional copy of *fpoO* (*fpoO2*) that is approximately 3 kb downstream of the first copy in the *fpo* operon (*fpoO1*) (Fig. S1) (2). Both FpoO subunits show 79% amino acid identity, but FpoO2 lacks 1 of the cysteines (C<sup>94</sup>) that coordinates the iron-sulfur cluster. The FpoO subunits from *M. mazei* and *M. acetivorans* show 80% amino acid identity, but *M. barkeri* FpoO shows only ca. 60% identity to the other 2 FpoO subunits.

Electrons from FpoF through FpoI and then FpoB are thought to be transferred to the membrane-integral module of Fpo, FpoAHJKLMN, which uses them to reduce methanophenazine by an as yet unknown mechanism (5). All hydrophobic Fpo subunits possess 77% to 99% amino acid sequence identity among the 3 *Methanosarcina* species (Table S1). Also, in all of the species, FpoJ is encoded by 2 contiguous *fpoJ* genes, such that the first gene encodes a protein that is homologous to the amino terminus of NuoJ, and the second encodes a protein that is homologous to the carboxyl terminus of NuoJ (2). Interestingly, *M. acetivorans* Fpo has been proposed to contain a small

additional subunit, FpoP, when grown on CO as the growth substrate (6). However, there is no experimental evidence that FpoP protein is produced, nor is the gene conserved in the other 2 *Methanosarcina* species (2). Thus, it still is unknown if FpoP has a role in methanogenesis from any substrate. In conclusion, the *in silico* analysis of Fpo predicted protein sequences from the 3 *Methanosarcina* species shows conservation of all important catalytic and structural residues in the proteins, suggesting that they may be functional.

## Materials and Methods

**Construction of *M. barkeri* Fusaro Deletion Mutants.** The markerless genetic exchange method (7) was used to delete the *fpoA-O* operon (*fpo*), *fpoF*, and *freAEGB* operon (*fre*) in the  $\Delta hpt$  (WWM85 or WWM86) (8) background of *M. barkeri* Fusaro (Table S2). DNA sequences immediately flanking the deleted genes were left intact to exclude loss of regulatory elements needed for expression of adjacent genes. The plasmids pDK4, pDK13, and pGK6 were used to delete *fpoA-O* in WWM86, *fpoF* in WWM85, and *fre* in WWM85, respectively, on methanol plus  $H_2/CO_2$  as the growth substrate. The *frhADGB* operon (*frh*) was deleted in the  $\Delta hpt$  (WWM86),  $\Delta fpo$  (WWM71), and  $\Delta fpoF$  (WWM123) backgrounds of *M. barkeri* Fusaro by the homologous recombination-mediated gene replacement method (9). In this method, the *NotI*-cut 5.5-kb region of pAMG81 was transformed into  $\Delta hpt$ ,  $\Delta fpo$ , and  $\Delta fpoF$  mutants, and the transformants were selected on methanol plus  $H_2/CO_2$  and puromycin to obtain  $\Delta frh$  (WWM122),  $\Delta fpo/\Delta frh$  (WWM108), and  $\Delta fpoF/\Delta frh$  (WWM145) mutants, respectively. All of the mutants were confirmed by DNA hybridization. All genetic manipulations were carried out using methanol plus  $H_2/CO_2$  as the growth substrate because the  $F_{420}H_2$ :heterodisulfide oxidoreductase system was not expected to be required for growth via the methyl-respiration pathway.

**Determination of Growth Characteristics.** For growth rate determination, cultures were adapted to all substrates for at least 15 generations or, in the absence of growth on a particular substrate, were grown on methanol plus  $H_2/CO_2$  to mid-log phase ( $OD_{600}$ , ca. 0.5). An approximately 3% inoculum of the culture then was transferred to fresh medium in quadruplets and incubated at 37 °C. Growth substrates provided were methanol (125 mM) or sodium acetate (120 mM) under a headspace of either  $N_2/CO_2$  (80%/20%) at 50 kPa over ambient pressure or  $H_2/CO_2$  (80%/20%) at 300 kPa over ambient pressure. Puromycin (CalBioChem) was added at 2  $\mu g/mL$  for selection of the puromycin transacetylase (*pac*) gene (7, 10). 8-aza-2,6-diaminopurine (8-ADP) (Sigma) was added at 20  $\mu g/mL$  for selection against the presence of *hpt* (7). Lag phase was defined as the time required to achieve half-maximal  $OD_{600}$ .

**Cell Suspension Experiments.** Cells grown on methanol plus  $H_2/CO_2$  were collected in late-exponential phase ( $OD_{600} = 0.6-0.7$ ) by centrifugation at  $5000 \times g$  for 15 min at 4 °C. The cells were washed once with anaerobic high-salt Pipes buffer, 50 mM Pipes (pH 6.8), 400 mM NaCl, 13 mM KCl, 54 mM  $MgCl_2$ , 2 mM  $CaCl_2$ , 2.8 mM cysteine, 0.4 mM  $Na_2S$ , and were resuspended in the same buffer to a final concentration of  $10^9$  cells/mL. Assay mixtures contained 2 mL of the suspension and were incubated under strictly anaerobic conditions in 25-mL Balch tubes sealed with butyl rubber stoppers. Puromycin (20  $\mu g/mL$ ) or Mupirocin (pseudomonic acid, 105  $\mu g/mL$ , Sigma-Aldrich) (11) was added

to prevent protein synthesis and, as indicated, the assay mixture contained 250 mM methanol and a headspace of N<sub>2</sub>, H<sub>2</sub>, or H<sub>2</sub>/CO<sub>2</sub> (80%/20%) at 250 kPa over the ambient pressure. Cells were held on ice until use, and assays were started by transferring to 37 °C. For rate determination, gas-phase samples were withdrawn at various time points and assayed for CH<sub>4</sub> by gas chromatography at 225 °C in a Hewlett-Packard gas chromatograph (5890 Series II) equipped with a flame ionization detector. The column was of stainless steel filled with 80/120 Carbopack B/3% SP-1500 (Supelco) with helium as the carrier gas. For total CH<sub>4</sub> and CO<sub>2</sub> production, assays were incubated at 37 °C for 36 h; then gas phase samples were withdrawn. These samples were analyzed by gas chromatography at 225 °C in a Hewlett-Packard gas chromatograph (5890 Series II) equipped with a thermal conductivity detector. A stainless steel 60/80 Carboxen-1000 column (Supelco) with helium as the carrier gas was used. Total cell protein was determined using the Bradford method (12) after 1 mL of the cells was lysed by resuspending the pellet in double-distilled H<sub>2</sub>O with 1 μg/mL RNase and DNase.

**RNA Isolation and Quantitative RT-PCR.** Cultures grown to mid-exponential phase (OD<sub>600</sub> ca. 0.28 for *Δfth* and ca. 0.4 for other strains) on methanol were lysed using 3 volumes of TRIzol LS Reagent (Invitrogen), followed by phase separation using chlo-

roform according to the manufacturer's instructions. Subsequently, RNA was precipitated using 1 volume of 70% ethanol and purified using RNeasy mini spin columns (Qiagen) according to the manufacturer's protocol. Contaminating DNA was removed by treatment with TURBO DNA-free DNase (Ambion). The concentration and purity of RNA were evaluated using a NanoDrop spectrophotometer (NanoDrop).

All reactions (20 μL) contained 1X SYBR Green Reaction Mix with ROX, 0.4 μL SuperScript III RT/Platinum Taq mix, 100 ng RNA, and 10 pmol each of primers. Synthesis of cDNA from RNA and subsequent amplification were performed as follows: 50 °C for 5 min and 95 °C for 2 min, followed by 40 cycles of 95 °C for 15 s and 60 °C for 1 min. We ran 2 negative controls, 1 without reverse transcriptase and another without template RNA, to check for DNA or RNA contamination.

Standard curves relating cycle threshold values versus log amount of RNA were constructed for *fpo* and *rpoA1* using RNA isolated from methanol-grown WWM85 (Table S2). The amount of *fpo* RNA in each sample was calculated using linear regression of the standard curve and averaged across triplicates of 3 biological samples for each culture. The average *fpo* amount was normalized to the average *rpoA1* amount to obtain the relative *fpo* amount. This value was divided by the calibrator value (WWM85) to obtain *fpo* fold regulation from wild type.

1. Baumer S, et al. (2000) The F<sub>420</sub>H<sub>2</sub> dehydrogenase from *Methanosarcina mazei* is a redox-driven proton pump closely related to NADH dehydrogenases. *J Biol Chem* 275:17968–17973.
2. Markowitz VM, et al. (2008) The integrated microbial genomes (IMG) system in 2007: Data content and analysis tool extensions. *Nucleic Acids Res* 36:D528–533.
3. Reeve JN (1992) Molecular biology of methanogens. *Annu Rev Microbiol* 46:165–191.
4. Deppenmeier U (2002) Redox-driven proton translocation in methanogenic Archaea. *Cell Mol Life Sci* 59:1513–1533.
5. Deppenmeier U (2004) The membrane-bound electron transport system of *Methanosarcina* species. *J Bionenerg Biomembr* 36:55–64.
6. Lessner DJ, et al. (2006) An unconventional pathway for reduction of CO<sub>2</sub> to methane in CO-grown *Methanosarcina acetivorans* revealed by proteomics. *Proc Natl Acad Sci USA* 103:17921–17926.
7. Pritchett MA, Zhang JK, Metcalf WW (2004) Development of a markerless genetic exchange method for *Methanosarcina acetivorans* C2A and its use in construction of new genetic tools for methanogenic archaea. *Appl Environ Microbiol* 70:1425–1433.
8. Guss AM, Rother M, Zhang JK, Kulkarni G, Metcalf WW (2008) New methods for tightly regulated gene expression and highly efficient chromosomal integration of cloned genes for *Methanosarcina* species. *Archaea* 2:193–203.
9. Zhang JK, White AK, Kuettner HC, Boccazzi P, Metcalf WW (2002) Directed mutagenesis and plasmid-based complementation in the methanogenic archaeon *Methanosarcina acetivorans* C2A demonstrated by genetic analysis of proline biosynthesis. *J Bacteriol* 184:1449–1454.
10. Possot O, Gernhardt P, Klein A, Sibold L (1988) Analysis of drug resistance in the archaeobacterium *Methanococcus voltae* with respect to potential use in genetic engineering. *Appl Environ Microbiol* 54:734–740.
11. Boccazzi P, Zhang JK, Metcalf WW (2000) Generation of dominant selectable markers for resistance to pseudomonic acid by cloning and mutagenesis of the *ileS* gene from the archaeon *Methanosarcina barkeri* Fusaro. *J Bacteriol* 182:2611–2618.
12. Bradford MM (1976) A rapid and sensitive method for the quantitation of microgram quantities of protein utilizing the principle of protein-dye binding. *Anal Biochem* 72:248–254.
13. Guss AM, Mukhopadhyay B, Zhang JK, Metcalf WW (2005) Genetic analysis of *mch* mutants in 2 *Methanosarcina* species demonstrates multiple roles for the methanop-terin-dependent C-1 oxidation/reduction pathway and differences in H(2) metabolism between closely related species. *Mol Microbiol* 55:1671–1680.
14. Welander PV, Metcalf WW (2008) Mutagenesis of the C1 oxidation pathway in *Methanosarcina barkeri*: New insights into the Mtr/Mer bypass pathway. *J Bacteriol* 190:1928–1936.

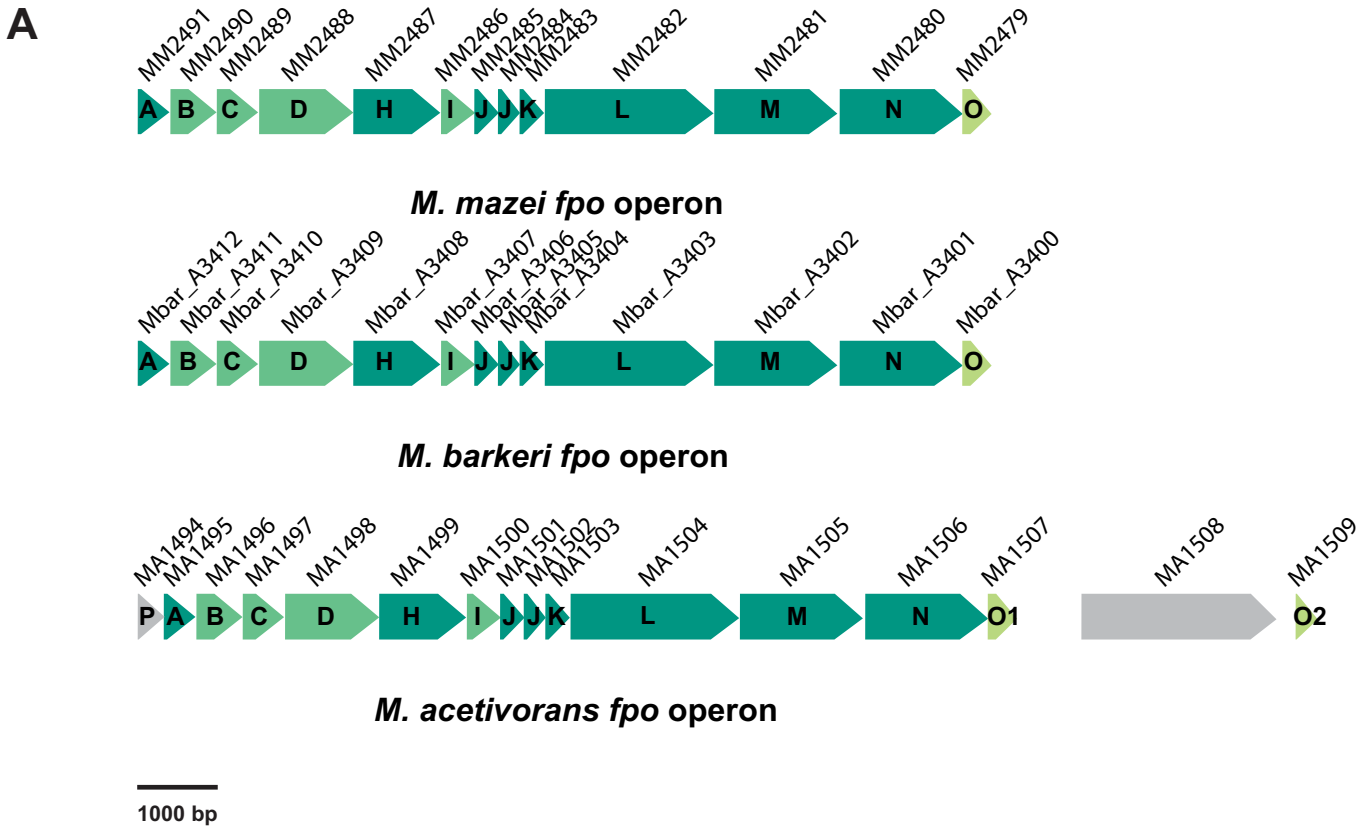

**Fig. S1.** Genomic organization of operons encoding F<sub>420</sub>-phenazine oxidoreductase (Fpo), F<sub>420</sub>-reducing hydrogenase (Frh), and heterodisulfide reductase (Hdr) in *Methanosarcina* species. (A) The 13-gene operon (*fpoABCDHIJJKLMNO*) that encodes the hydrophilic (FpoO), membrane-associated (FpoBCDI), and membrane-integral modules (FpoAHJKLMN) of Fpo in the 3 species. *M. acetivorans* harbors 2 copies of *fpoO*, *fpoO1* and *fpoO2*, and *fpoP* that are not present in the other 2 *Methanosarcina* species. (B) The gene (*fpoF*) that encodes the input module of Fpo (FpoF). In all 3 species, *fpoF* is located between genes encoding methylenetetrahydroscarinapterin reductase (*mer*) and a putative cytidyltransferase (2). These genes may constitute an operon. (C) The F<sub>420</sub>-reducing hydrogenase operons (*frhADGB*) in the 3 species. *M. barkeri* has 2 of these operons, *frhADGB* and *freAEGB*. The *freAEGB* operon lacks gene *D* that encodes a putative hydrogenase maturation protein assumed to be essential for posttranslational modification of the *cis*-encoded hydrogenase. (D) The operons encoding heterodisulfide reductase (HdrED) in the 3 species. Other ORFs are shown as gray arrows.

**B**

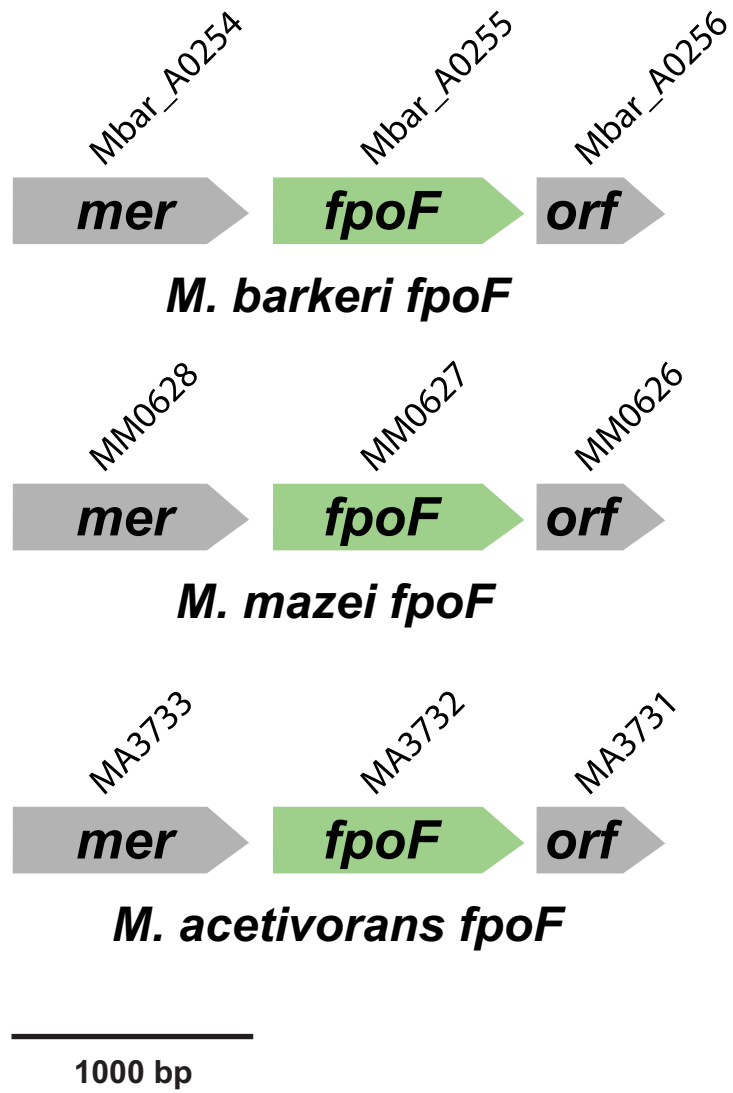

Fig. S1. Continued.

C

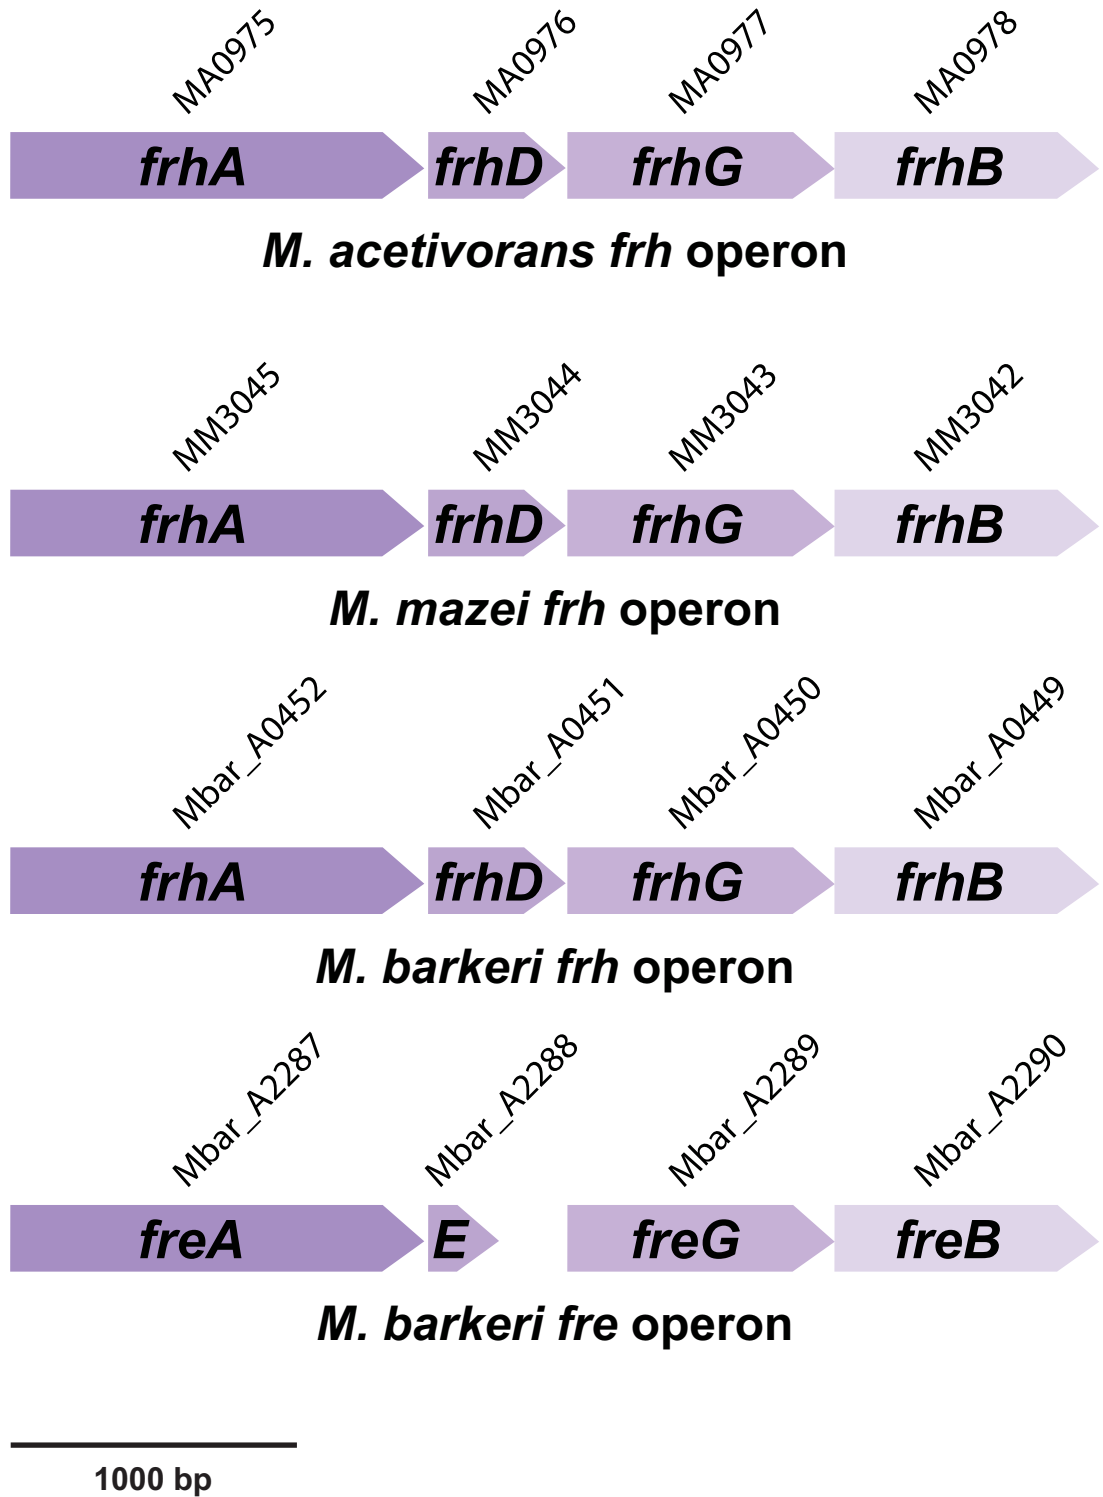

Fig. S1. Continued.

D

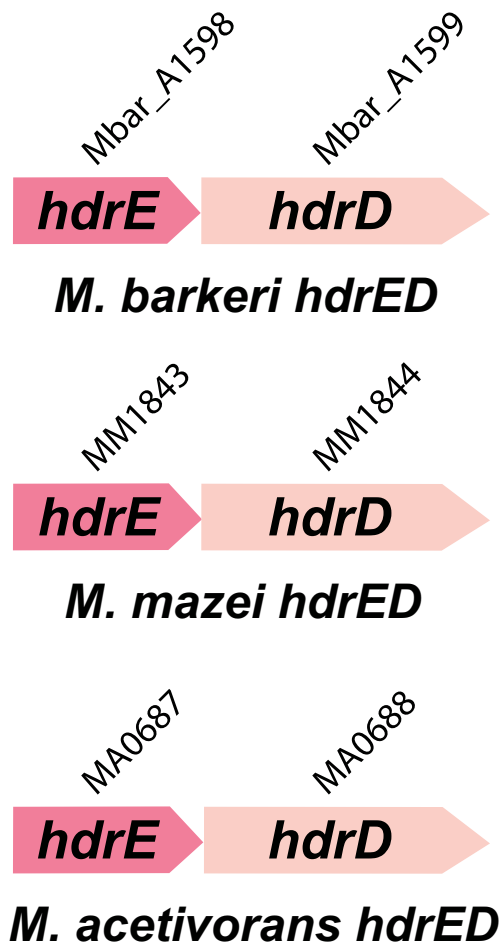

1000 bp

Fig. S1. Continued.

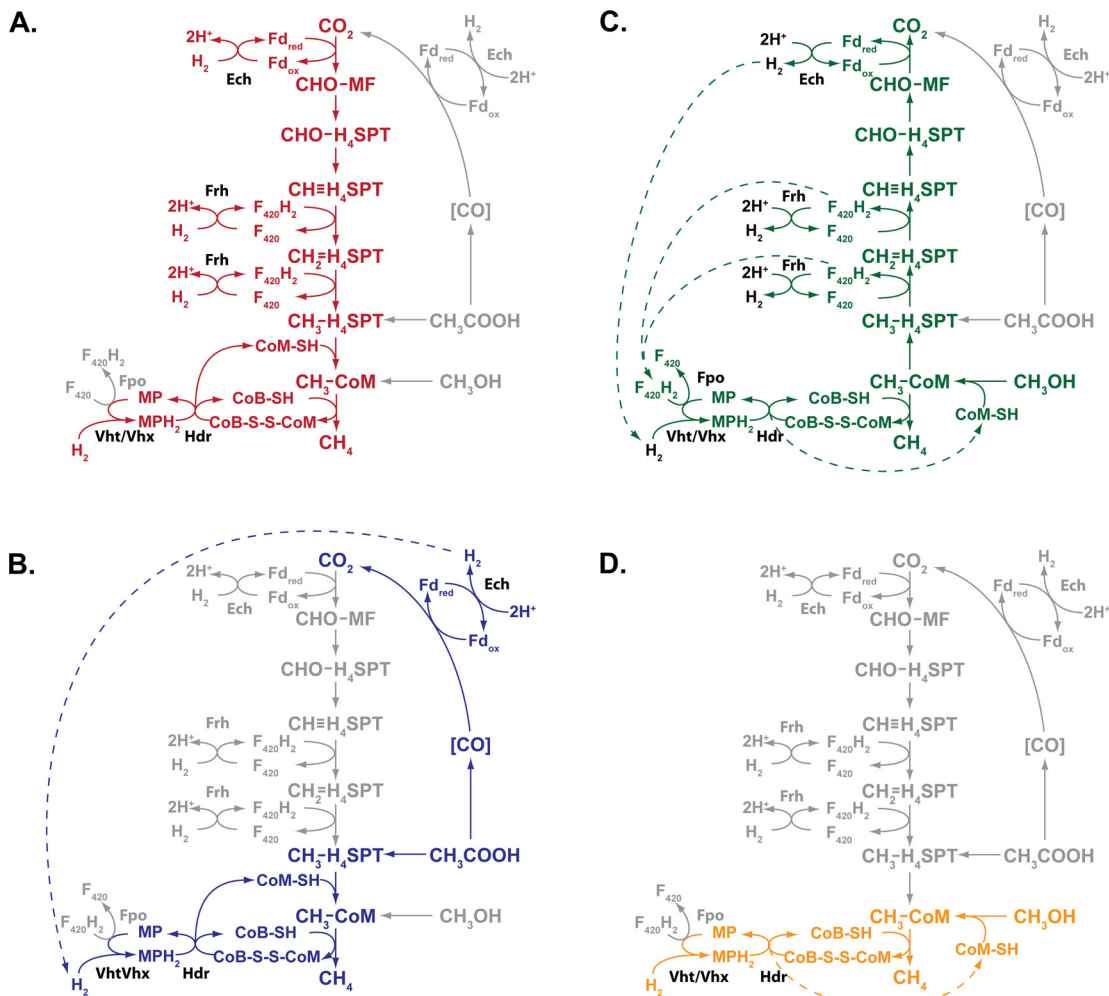

**Fig. S2.** Four overlapping methanogenic pathways found in *M. barkeri* (adapted from ref. 13). Each pathway shares a common step in the reduction of methyl-CoM to methane; however, they differ in the route used to form methyl-CoM and in the source of electrons used for its reduction to methane. (A) Many methanogens reduce CO<sub>2</sub> to methane using electrons derived from the oxidation of H<sub>2</sub> (hydrogenotrophic pathway). (B) Alternatively, acetate can be split into a methyl group and an enzyme-bound carbonyl moiety. The latter is oxidized to CO<sub>2</sub> to provide electrons required for the reduction of methyl group to methane (acetoclastic pathway). (C) C1 compounds such as methanol or methylamines also can be disproportionated to CO<sub>2</sub> and methane. In this pathway, 1 molecule of the C1 compound is oxidized to provide electrons for reduction of 3 additional molecules to methane (methylotrophic pathway). (D) C1 compounds can be reduced using electrons derived from H<sub>2</sub> oxidation (methyl respiration pathway). Steps not required by each pathway are shown in gray. The steps catalyzed by Fpo, Frh, Vht/Vhx, Ech, and Hdr proteins are indicated. Note that Fpo is predicted to be required in the methylotrophic pathway and Frh in the hydrogenotrophic pathway. Abbreviations: CH<sub>2</sub>-H<sub>4</sub>SPT, methylene-tetrahydrodarsarcinapterin; CH≡H<sub>4</sub>SPT, methenyl-tetrahydrodarsarcinapterin; CH<sub>3</sub>-H<sub>4</sub>SPT, methyl-tetrahydrodarsarcinapterin; CH<sub>3</sub>-CoM, methyl-coenzyme M; CHO-H<sub>4</sub>SPT, formyl-tetrahydrodarsarcinapterin; CHO-MF, formyl-methanofuran; CoB-SH, coenzyme B; CoM-SH, coenzyme M; CoM-S-S-CoB, mixed disulfide of CoM-SH and CoB-SH; F<sub>420</sub>/F<sub>420</sub>H<sub>2</sub>, oxidized and reduced Factor 420; Fd<sub>ox</sub>/Fd<sub>red</sub>, oxidized and reduced ferredoxin; Fpo, F<sub>420</sub>H<sub>2</sub>:phenazine oxidoreductase; Frh, F<sub>420</sub>-reducing hydrogenase; Hdr, heterodisulfide reductase; MP/MPH<sub>2</sub>, oxidized and reduced methanophenazine; Vht/Vhx, methanophenazine-dependent hydrogenase. Ech, Fd-dependent hydrogenase.

## 1. FpoF

```
Mm FpoF      MPPKIAEVIQHDVCAACGACEAVCPIGAVTVKKAAEIRDPNDLSLYEKGAAFQVCEGCLT 60
Ma FpoF      MPPKIAEVIDYDVCAACGACEAVCPIGAVTVKKAAGIRDPNDLSLYEKGGYQVCEGCLT 60
Mb FpoF      MPPKIAEVIQHDVCAACGACEAVCPIGAVTVRKA AEIRDPNDPNLYQKGAGYLVCEGCLT 60

Mm FpoF      CSRICPVVDGFIENELLNVRKFFGAKSKDNAGSQDGGVTSGLKALFNKGEIDCAVGITR 120
Ma FpoF      CSRVCPPVVDGFIQDELTNVRKFFGARSKDNVGSQDGGVASGILKSLFKQKIDCAVGITR 120
Mb FpoF      CSRICPVVDGFIENELANVRKFFAARSKENAGSQDGGVTSGLKSLFKQKIDCAVGITR 120

Mm FpoF      NENWEPEVLLTSAEDVERTRGTKYTSDPVVAALREAFEKYDRIAVVGVPCQAHAARLIR 180
Ma FpoF      NEKWEPEVLLTSAEDVERTRGTKYTSDPVLAALREAFEKYDRIAVIGVPCQAHAHLIR 180
Mb FpoF      DEKWESKVLLTSAEDVEKVRGTRGTYTSDPVVAALREAFEKYDRIAVVGVPCQAHSARLIR 180

Mm FpoF      ENVNEKIVLIIIGLLCMESFHHDVMLDKI IPEIMKVNVRDIVKMEFTKGKFWVYTKDGEVH 240
Ma FpoF      ENVNEKIVLIIIGLLCMESFHHDVMLEKI IPEILKVKLEDIRKMEFTKGKFWVYTKDGEVH 240
Mb FpoF      ENVSEKIVLIIIGLLCMESFHHDVMLDKI IPEIMKVKIEDVRKMEFTKGKFWVYTS DGEVH 240

Mm FpoF      SVPIKDI AKYARNPCHHCCDYTSVFADISVGSV GADGWNSV FIRTEIGEKEYFDMVRDEM 300
Ma FpoF      SVPIKDVAKFARNPCHHCCDYTSVFADISVGSV GADGWNSV FIRTEIGEKEYFDMVREDM 300
Mb FpoF      SVPIKDVAKYARNPCHHCCDYTSVFADISVGSV GADGWNSV FIRTDAGEEYFEMVREEM 300

Mm FpoF      EIMEDPKPGLELVGKLIEMKRKGNAEHFQEVCKEFSFETGIRSETV 346
Ma FpoF      EIMEDPKPGLELVKLIEMKRKGNAEHFLEVCKEFSFETGIRNETI 346
Mb FpoF      EIMEDPKPGLELVKLIEMKRKGNAEHFKEVCKEFSFETGIRDET V 346
```

## 2. FpoA

```
Ma FpoA      -----MSGIIDSYI PVAIFLAVGLIMPPMTMFMVKQLSPRKAASKYTTYESGSIPTGTA 55
Mm FpoA      MIGDTMSGIIDSYI PVAIFLAVGLIMPPMTMFMVKQLSPRKAASKYTTYESGSIPTGTA 60
Mb FpoA      -----MSEIIDSYI PVAIFLVVALIMPPMTMFMVKQLSPRKAAGKYTTYESGSIPTGTA 55

Ma FpoA      RIQFNVEYYLYAIAFVLEDIEVLF LYPWATVYKGHGITSIAVVEMFVFIFILLFGYVYLW 115
Mm FpoA      RIQFNVEYYLYAIAFVLEDIEVLF LYPWATVYKGHGITSIAVVEMFVFIFILLFGYVYLW 120
Mb FpoA      RIQFNVEYYLYAIAFVLEDIEVLF LYPWVTVYKGHGITSIAVVEMFAFIFILLFGYIYLW 115

Ma FpoA      KKEALTWVK 124
Mm FpoA      KKEALTWVK 129
Mb FpoA      KKGALTWVK 124
```

## 3. FpoB

```
Ma FpoB      MGEVKETKTNNNTGTPEEEIPGVITTTTNAISDFLKKTKAQDLINWGRKNSLWFMTQPMG 60
Mm FpoB      MGEVKETKTNNSKENPEEEVPGVITTTTSAIHNFLKKTKAQDIINWGRKNSLWFMTQPMG 60
Mb FpoB      MGEVKEKTSKPYETSEEEIPGVITTTTNAISEFLKKTKVQDIINWGRKNSLWFMTQPMG 60
```

Fig. S3. F<sub>420</sub>:phenazine oxidoreductase (Fpo) subunit alignments. Inferred protein sequences were aligned using ClustalW for each Fpo subunit from *M. barkeri* (Mb), *M. mazei* (Mm), and *M. acetivorans* (Ma). Green bases denote conserved amino acid residues. Red bases highlighted in yellow are proposed to coordinate iron-sulfur centers or bind the substrate methanophenazine. Refer to text for Fpo sequence analysis.



Ma FpoB **CCG**VEMIA**TG**CAHYD**TDR**FGIIPRNSPRHADVMIISGYVTKKYL**PAL**KRLWE**QMP**APKWV 120  
 Mm FpoB **CCG**VEMIA**TG**CAHYD**TDR**FGIIPRNSPRHADVMIISGYVTKKYL**PAL**KRLWD**QMP**APKWV 120  
 Mb FpoB **CCG**VEMIA**MGC**AHYD**TDR**FGIIPRNSPR**QAD**VMLISGYVTKKYL**PAL**KRLWE**QMP**SPKWV 120  
  
 Ma FpoB IAMGD**CS**ISGGPFYESTVQ**NIDE**LFIDVFI**PGCP**PRPEALIQGFV**LQEK**IKAKKDR 180  
 Mm FpoB IAMGD**CA**ISGGPFYESTVQ**NIDE**IFIDVYI**PGCP**PRPEALIQGFV**LQEK**IKARKDR 180  
 Mb FpoB IAFGD**CS**ISGGPFYESTVQ**NIDE**IFIDV**FVPGCP**PRPEAM**LQGF**V**LQEK**IKAKKDL 180  
  
 Ma FpoB GTEY 184  
 Mm FpoB GTEY 184  
 Mb FpoB GSEY 184

#### 4. FpoC

Ma FpoC MDAMT**II**ESLTGKF**FPE**AISEAEVESPIRIRAYADKEKAKEV**CQYL**KDSLQ**F**DH**LC**SVCGV 60  
 Mm FpoC MDART**II**ESLTGKF**FPE**AISEAGIESPIRIRAYVDKDKAKEV**CEYL**KGSLQ**F**DH**LC**SVSGV 60  
 Mb FpoC MDVTE**IL**KS**LTGA**F**FPE**AISE**TTA**ESEIRARAYVEKE**TK**EV**CQYL**KDSLQ**F**DH**LC**SVCGV 60  
  
 Ma FpoC DYPQ**RNE**QEVVYHIAS**YDHP**VV**ML**KAR**LP**RD**SP**EIESIVPVY**WNAN**WYERETYEL**FG**IF 120  
 Mm FpoC DYPQ**RDE**LEAVYHIAS**YDHP**VV**ML**KAR**LP**RD**SP**EIESVSVY**WNAN**WYERETYEL**Y**GI**F** 120  
 Mb FpoC DYIK**RNE**LEVYHIAS**YNHP**VV**TL**KAK**LP**REN**PE**IESIVSVY**WNAN**WYERETYEL**FG**IL 120  
  
 Ma FpoC FKNHP**NL**KALV**LP**ED**ML**GE**W**PLR**KD**YEG**FP**NR**TAR**NLV 158  
 Mm FpoC FKNHP**EL**KPLV**LP**DD**ML**GE**W**PLR**KD**YEG**FP**NR**TAR**NLV 158  
 Mb FpoC FKNHP**NL**KPL**IL**PE**DM**LG**E**W**PL**R**KD**YEG**FP**N**K**TAR**NL**V 158

#### 5. FpoD

Mb FpoD MEEKLEPNEMIVHLG**PQHP**Q**PG**PFRL**NL**R**LK**GETVVDAD**IEL**GF**IHK**GIEKILE**NK**TYL 60  
 Ma FpoD MEEMLEPNEMIVHLG**PQHP**Q**PG**PFRL**NL**R**LK**GETVMDA**EV**EL**GF**I**HK**GIEKILE**NK**TYL 60  
 Mm FpoD MEEMLESNEMIVHLG**PQHP**Q**PG**PFRL**NL**K**LK**GETIMDA**EV**EM**GY**I**HK**GIEKILE**NR**TYL 60  
  
 Mb FpoD QGITIVDR**IC**YL**VA**LVNEEC**FV**GC**TE**KLLG**IE**PPERSQYIRV**IL**DEL**TRI**Q**SH**LL**GM**GE**F** 120  
 Ma FpoD QGITIVDR**IC**YL**VA**LTNEEC**FV**GC**TE**KLLG**IE**PPERAQYIRV**IL**EELS**RL**Q**SH**LL**GM**GE**F** 120  
 Mm FpoD QGITIVDR**IC**YL**VA**LTNEEC**YV**GC**VE**KLLD**IE**PPERAQYIRV**IL**EELS**RL**Q**SH**LL**GL**GE**Y** 120  
  
 Mb FpoD GEFIGFVSMFMYTIREREEVLS**LI**DMITGAR**ITH**S**YL**K**FG**GVR**DD**LP**GF**KE**KAL**S**V**LN**N** 180  
 Ma FpoD GEFIGFVSMFMYTIKERED**IL**TLID**MV**TGAR**V**TH**S**YL**K**FGGVR**DD**LP**EG**FKE**KAL**P**V**LN**N** 180  
 Mm FpoD GEFIGFVSMFMYTIKERED**IL**TLID**MV**TGAR**V**TH**S**YL**RF**GGVR**DD**LP**EG**FKE**KT**IP**V**LN**K** 180  
  
 Mb FpoD LKKS**V**DD**F**EEM**F**HTDRIYR**ERT**VG**V**GLTAD**V**AK**N**LG**V**SG**P**PLR**AT**GV**PF**DIR**KNE**P**YL**V 240  
 Ma FpoD LKK**V**IS**D**YEEM**F**NSDRIYR**ERT**VG**V**GLTAD**V**AK**N**LG**V**SG**P**PLR**AT**GV**PF**DIR**KNE**P**YL**V 240  
 Mm FpoD LKK**V**IR**D**YEEM**F**YS**D**TIYR**ERT**IG**I**GV**L**TAD**E**AK**S**LG**V**SG**P**V**L**R**AT**GV**PF**DIR**KNE**P**YL**V 240  
  
 Mb FpoD YKDLDFK**V**CTETAG**DC**FAR**V**Q**VR**INE**I**RES**IY**ILE**QC**FD**Q**IP**SG**PL**F**PE**GS**LY**GR**RT**P**V**M** 300  
 Ma FpoD YKDLDFK**V**CTETAG**DC**FAR**V**Q**VR**LNEMRES**IY**ILE**QC**LD**Q**IP**NG**PL**F**PE**G**TP**Y**GR**RT**P**V**M 300  
 Mm FpoD YRDLDFK**V**CTETAG**DC**FAR**V**Q**VR**LNEMRES**IY**IE**QC**LD**M**IP**NG**PI**F**PE**G**TP**Y**G**K**RT**P**V**M** 300

Fig. S3. Continued.

Mb FpoD RVPAGEVIFYRVEDPRGEMGMYMISDGSDKPYRVKIRGPYYPTLQALPPLIIGTTVADVAA 360  
 Ma FpoD RVPAGEVFHRVEDPRGEMGMYMISDGSDKPYRVKVRGPYYPTLQALPPLIKGTTVADVAA 360  
 Mm FpoD RVPAGEVFHRVEDPRGEMGMYMVS DGS DRPYRVKVRGPYYPTLQALPPLIIGTTVADMVS 360  
  
 Mb FpoD ISGSMDGCTSEADR 374  
 Ma FpoD ISGSMDGCTSEADR 374  
 Mm FpoD ISGSMDGCTSEVDR 374

## 6. FpoH

Ma FpoH -MNIMIEIPEFIIPLIPWIRGVVGLVLVGAIFLGAMGAVWLERKLSADIQFRYGPSRVGK 59  
 Mm FpoH MTFMAIEIPEFIVPFVWIRGTVGLVLVGAIFLGGMAAVWIERKLSADIQLRYGPSRVGK 60  
 Mb FpoH ---MTVVIPEYITPLIPWVRGIVGLVLIGVIFMGAMGAVWLERKLSADIQTRMGPCRVGK 57  
  
 Ma FpoH FGLLQLVADAIKLF<sup>T</sup>KEDMRPNADRL<sup>L</sup>FDNAPI<sup>F</sup>MMSSV<sup>F</sup>FLMLVAIPVGAVFINGVEY<sup>P</sup> 119  
 Mm FpoH FGLLQLVADAIKLF<sup>T</sup>KEDVRPGNADRFLYDNAPV<sup>F</sup>MLT<sup>S</sup>LFLMLVAIPVGAVFIDGNLY<sup>P</sup> 120  
 Mb FpoH YGLLQLVADAIKLF<sup>T</sup>KEDL<sup>K</sup>PLNADSL<sup>L</sup>FNNANI<sup>F</sup>MLGS<sup>V</sup>FLMLVALPVGAVFINGVEY<sup>P</sup> 117  
  
 Ma FpoH LAVTEMDISVLYIEAMSAITIFGIFMIAYG<sup>S</sup>NNKYSLLGAF<sup>R</sup>NFARMVGYE<sup>V</sup>PLGITV<sup>S</sup> 179  
 Mm FpoH LAVTEMDISILFIEAVSAINIFGIFMAAYG<sup>S</sup>NNKYSLLGAF<sup>R</sup>NFARMIGYE<sup>V</sup>PLGIAIV<sup>S</sup> 180  
 Mb FpoH LAVTQMDISVLYIEAVSALSIFGIFMVAYG<sup>S</sup>NNKYSLLGAF<sup>R</sup>NFARMVGYE<sup>V</sup>PLGITV<sup>S</sup> 177  
  
 Ma FpoH VAIMTGS<sup>L</sup>NI<sup>V</sup>EIASAQG-LLWNI<sup>F</sup>LQPIG<sup>F</sup>IVFFIALMAD<sup>M</sup>GRL<sup>P</sup>FDQNESEEE<sup>L</sup>VAG<sup>W</sup> 238  
 Mm FpoH VAVMTGS<sup>L</sup>NI<sup>I</sup>DITSAQGSFVWNI<sup>F</sup>LQPIG<sup>F</sup>VVFFIALMAD<sup>L</sup>GRL<sup>P</sup>FDQNESEEE<sup>L</sup>VAG<sup>W</sup> 240  
 Mb FpoH VAAMTGS<sup>L</sup>NI<sup>V</sup>DISTAQG-LHWNIFLQPLG<sup>C</sup>FVFFVSLMAD<sup>M</sup>GRL<sup>P</sup>FDQNESEEE<sup>L</sup>IAG<sup>W</sup> 236  
  
 Ma FpoH ITEYTGMR<sup>F</sup>GLG<sup>F</sup>FAEYIHMILGS<sup>F</sup>LVAL<sup>L</sup>FLGGW<sup>N</sup>VPAFVANNP<sup>V</sup>LGLIAPT<sup>G</sup>FLLK<sup>T</sup> 298  
 Mm FpoH VTEYTGMR<sup>F</sup>GLV<sup>F</sup>FAEYMHMILGS<sup>F</sup>LVAL<sup>L</sup>FLGGW<sup>N</sup>VPAFVANNAV<sup>L</sup>LGLIAPT<sup>G</sup>ILLK<sup>T</sup> 300  
 Mb FpoH ITEYCGMR<sup>F</sup>GLG<sup>F</sup>FAEYIHMILGS<sup>F</sup>LVAL<sup>L</sup>FLGGW<sup>N</sup>VPGFIANNS<sup>F</sup>FGIIVPT<sup>G</sup>FLIV<sup>K</sup> 296  
  
 Ma FpoH VLVLMTIIGMRWAVPRFRIDQVVDLSW<sup>K</sup>RL<sup>L</sup>PLSLLNLVWAVGLGLYLGA 348  
 Mm FpoH VLVLMTIIGMRWAVPRFRIDQVVDMSW<sup>K</sup>LL<sup>L</sup>PLSLLNLWAVGLGLYLGA 350  
 Mb FpoH VFVLMVIIGLRWAVPRFRIDQVVDLSW<sup>K</sup>LL<sup>L</sup>PLALLNLVWAVGLGLYLGA 346

## 7. FpoI

Ma FpoI MVLKNIKYAVKNI<sup>P</sup>KKRV<sup>T</sup>RLCPEVESPLSDRFRGLQILD<sup>K</sup>SK<sup>C</sup>IG<sup>C</sup>GICANT<sup>CP</sup>NNAIK 60  
 Mm FpoI MVLKNIKYALKNI<sup>P</sup>KERV<sup>T</sup>RLCPEVESPLSERFRGLQILD<sup>K</sup>SK<sup>C</sup>IG<sup>C</sup>GICANT<sup>CP</sup>NSAIK 60  
 Mb FpoI MVLKNIKYAIRNITRPPV<sup>T</sup>RMYPEKQSELSDRFRGLQILD<sup>K</sup>SK<sup>C</sup>IG<sup>C</sup>GICANT<sup>CP</sup>NNAIK 60  
  
 Ma FpoI IVKAPIAPGSSKQ<sup>R</sup>WFPEIDIGH<sup>CLFCGLCIDQCP</sup>KGALSSGKEYTKGMV<sup>K</sup>WAHKD<sup>L</sup>LLMT 120  
 Mm FpoI IVKAPIAPGSEK<sup>R</sup>WF<sup>P</sup>QIDIGH<sup>CLFCGLCIDQCP</sup>KGALSSGKEYCKGMV<sup>K</sup>WAHKD<sup>L</sup>LLMT 120  
 Mb FpoI IVKAPIAPGSTK<sup>Q</sup>RF<sup>P</sup>QIDIGH<sup>CLFCGLCIDQCP</sup>KGALSSGKEYAKGLV<sup>K</sup>WKHKD<sup>L</sup>LLIT 120  
  
 Ma FpoI PEKLAREVDIKEGDEK 136  
 Mm FpoI PEKLAREVDIQEGDER 136  
 Mb FpoI PEKLAREVDLEGEDEK 136

Fig. 53. Continued.

## 8. FpoJ

Ma FpoJ1 MIGLETVGAALEMAVFGLLAFVTVFFFAIFVVIKDVVRAGLALIMCMFGVAALYILLNAQ 60  
Mm FpoJ1 MIDPGTVGAALETAVFGLLALVTVFFFAIFVVIKDVVRAGLALIMCMFGVAGLYILLNAQ 60  
Mb FpoJ1 MIELETIGEALKMAVFVWLAISTVFFFAVFFVTAKDIVRAGLALIMCMFGIAALYILLNAQ 60

Ma FpoJ1 FLGIIQVLVYIGAIGVLILFAVMLTKRHLGGGSRAD 96  
Mm FpoJ1 FLGVIQVLVYIGAIGVLILFAVMLTKREIGGGPRAN 96  
Mb FpoJ1 FLGIIQVLVYIGAIGVLILFAVMLTKHEIGGEPGED 96

## 9. FpoJ

Ma FpoJ2 MGPVRINRPLALLVSLLFVAVIVTGVFGTSWHTVSELLENPADPSNIQIGMLIFTQYVV 60  
Mm FpoJ2 ---MQINRPLAFLVCLLFVAVVVTGAFGTSWNTVSELLENPADPSNIEGIGMLIFTTFVA 57  
Mb FpoJ2 ---MRINRPLAFLVLLFTAIVVIGAFGTSWNTVSELQSPADQSNIEGIGMLIFTQYVA 57

Ma FpoJ2 PFEVLSIVLLASLIGAIYMAKGEGR 86  
Mm FpoJ2 PFEVLSIVLLASLIGAIYMAKGEGR 83  
Mb FpoJ2 PFEVLSIVLLASLIGAIYLAKGEGR 83

## 10. FpoK

Ma FpoK MTAIPLTFYLGLAALLFSIGLYGVMTHKSGIRMIMCIELMLNSANLNLFVAFSSYDTLNG 60  
Mm FpoK MTAIPLTFYLGLAALLFSIGLYGVMTHKSGIRLIMCIELMLNSANLNLFVAFSSYDTLHG 60  
Mb FpoK --MIPLIFYLGLAALLFSIGLYGVMTHKNGIRMIMCIELMLNSANLNLFVAFSSYDTLNG 58

Ma FpoK QVFAIFSIALAAAEAAVGFVFAIFMAIYRMHDKINLDELNLRW 102  
Mm FpoK QVFAMFSIALAAAEAAVGFVFAIFMAIYRMHDKINLDELNLRW 102  
Mb FpoK QVFAVFSIALAAAEAAVGFVFAIFMAIYRMHDKINLDELNLRW 100

## 11. FpoL

Ma FpoL MVKTALEEF AFLIPLLPALAF AITFFFGRKMPSSGGAIVPILAI AASFVISFAITLGLLAN 60  
Mm FpoL MVKTALEEF AFLIPLLPALAF AITFFFGRKMPSSGGAIVPILAI AASFVISFAITLGLLAN 60  
Mb FpoL -----MEEFAFLIPLLPALAFVITFFFGRKMPSSGGAIVPILAI AASFVISLMITLRLLAN 55

Ma FpoL PGEVVSQSYSWFAVLNIGILIDPLAAVMSVSVSLLIHIYAVSYM SHDAGKARYFAET 120  
Mm FpoL PEEVISQSYSWFAVLNIGILIDPLAAVMSVSVSLLIHIYAVSYM SHDAGKARYFAET 120  
Mb FpoL PDEVISQSYWFAVLNIGVLDPLAAVMSVSVSLLIHIYAVSYM GDPGEARYFAET 115

Ma FpoL ALFTAAMLSLVSDNQLQFVSWELVGLCSYLLIGFWFEKPSAAAAAKKAFLTTRIGDVM 180  
Mm FpoL ALFTAAMLSLVSDNQLQFVSWELVGLCSYLLIGFWFEKPSAAAAAKKAFLTTRIGDVM 180  
Mb FpoL ALFTAAMLSLVSDNQLQFVSWELVGLCSYLLIGFWFERPSAAAAAKKAFLTTRIGDVM 175

Fig. S3. Continued.

Ma FpoL FLTGIIVLTSDLLKLAGGFQEGVYLLRFDEIFSYIPQLSALQANIFGFEVSHLTIITLLF 240  
 Mm FpoL FLTGIIVLTSDLLKVSGGFDGVYLLRFDEIFSYIPELAALQINILGFEISHLTIITLLF 240  
 Mb FpoL FLTGIIVLTSDILKLAGGFQDGTYLLRFDEIFSYIPQLSALQTNIFGFEVSHLTIITLLF 235  
  
 Ma FpoL FGGAVGKSGQFPLHVWLPDAMEGPTTVSALIHAATMVTAGVYLVARTFPMFIAAPGTLMV 300  
 Mm FpoL FGGAVGKSGQFPLHVWLPDAMEGPTTVSALIHAATMVTAGVYLVARTFPMFIAAPDSLMV 300  
 Mb FpoL FGGAVGKSGQFPLHVWLPDAMEGPTTVSALIHAATMVTAGVYLVARTFPMFIAAPDSLMV 295  
  
 Ma FpoL IAYLGGFTALFAGTMGIVMNDLKRVLAYSTISQLGYMMLALGLGATVGLEAVGVSLFHLLI 360  
 Mm FpoL VAYFGGFTALFAGTMGIVMNDLKRVLAFSTISQLGYMMLGLGLGTAIGLEAVGISLFHLLI 360  
 Mb FpoL VAYLGGFTALFAGTMGIVMNDLKRVLAYSTISQLGYMMLGLGLGSAIGLEAIGISLFHLLI 355  
  
 Ma FpoL NHAFFKALLFLCAGSVIHAVGTQDMRELGGVGKVMPI TAGTMAIAALSLAGFGIPGTSIG 420  
 Mm FpoL NHAFFKALLFLCAGSVIHAVGTQDMRELGGVGKVMPIAATMTIAALALAGFGIPGTSIG 420  
 Mb FpoL NHAFFKALLFLCAGSVIHAVGTQDMRELGGVVRKVMPIVTAATMAIAALALAGFGIPGTSIG 415  
  
 Ma FpoL TSGFMSKDPPIENAYLFAEHSNWIPIYIFAIAAALLTSIYIFRLIFMTFAGKPRS DYHGH 480  
 Mm FpoL TSGFMSKDPPIEAAYLFGHESSNWIPIYVFSILAALLTSIYIFRLIFMTFTGKPRS NYHGH 480  
 Mb FpoL TSGFFSKDAIEAAYLFGENSNNWIPIYAFSIAAALLTSIYIFRLIFMTFTGKPRS DYHGH 475  
  
 Ma FpoL ESPSIMTVPLSILALFALVFGSLTRTGFMNFLEETFTNSFVDLNIGNLAGIGGYELVEAA 540  
 Mm FpoL ESPAIMTIPLSILAI FALAFGALTRTGFMNFLEETFTNSFVNLDIGALAGIGENELVAAA 540  
 Mb FpoL ESPAIMTIPLSILAI FSLVFGGLTKTGFMNFLEETFANGFVNLDIGGLAALGRNELVGTA 535  
  
 Ma FpoL GHEPVLILWLPLIMAVAGLAI AFVYYLRVFSLGPIASMKNPIYRLLYKRYQHEIYTEF 600  
 Mm FpoL GHEPLAVLWPPVIVALAGFAIAFVYYLRAFSLGPLASMKNPIYRLLYNRYQHQIYTEF 600  
 Mb FpoL GSESLFVQWLP MIVAVAGLAVAFVYYLRIIKLGPLASMKNPVYRLLYKRYQHKIYTEF 595  
  
 Ma FpoL FSIGIVYGVIAFLTQVVDVIVDSIVEGIGILT VGVGEELRKVQTGVVQTYATV IAGVSL 660  
 Mm FpoL FSIGIVYGIIAFLTQVVDVIDSVVEGIGIVTVFVGEELRKIQTG VVQTYATALIAGVSL 660  
 Mb FpoL FSLGIVYGVIALLSQVLDVIDSIVEGIGILT VGVSEELRRVQTGVVQTYAIVVIAGVSL 655  
  
 Ma FpoL LIILIKLITEVL 672  
 Mm FpoL LIILVKLIMEVL 672  
 Mb FpoL LIILVKLIMEVL 667

## 12. FpoM

Ma FpoM MLPVASLLILVPLIFAAVTFFTKTKDQAAGLGLIGSLVTLGLTLYAYLNFDSSSTAAMQFY 60  
 Mm FpoM MLPVASLLILVPLIFAVVTFFTKTKQLAAGFGFLGSLATLGLTLYAYLNFDSSSTAAMQFY 60  
 Mb FpoM MLPVASLLILVPLIFAAVTFFTKTKQQAAGLAFGLGSLATLGLTLYAYLNFDSSSTAAMQFF 60  
  
 Ma FpoM ESVPWVPFLGINYSVGIDGISMPLILLNAIVIPLLILFSWKEDREAPNRFYGLILTMQAA 120  
 Mm FpoM ESVSWIPFLGVNYSVGIDGVSMPLILLNAIVIPFMILFTWKEEMESP NRFYGLILTMQAA 120  
 Mb FpoM ESIDWIPLLGVKYSVGIDGISMPLILLNAIVIPFLILYSWKEEREDSNRFYGLILTMQAA 120  
  
 Ma FpoM VIGVFVALDFVVFYIFWELTLVPLFFIVNIWGGEKRAHAS YKFFIYTHVASLVMLLGIFG 180  
 Mm FpoM VIGVFVALDFVVFYIFWELTLVPLFFIVNLWGGANRAHAS YKFFIYTHVASLVMLLGIFG 180  
 Mb FpoM VIGVFVALDFVVFYIFWELTLIPLFFMVNIWGGEKRAHAS YKFFIYTHVASLVMLLGIFG 180

Fig. 53. Continued.

Ma FpoM LFY TALHQTGIPTFDIRELIAQFQFFESGLMRDAIFLAILFGFLAKLPTFPFHSWLPDAY 240  
 Mm FpoM LFY TALNQTGVPTFDIRELIAQFQFFEPGLMKDGI FLAILFGFLAKLPAFPFHSWLPDAY 240  
 Mb FpoM LFYASWQQTGVPTFDIRELVGQFQFLGSGLLRNAIFLSIIFGFLAKLPTFPFHSWLPDAY 240  
  
 Ma FpoM TEAPTAGSVLFILLKIGGYGLFRISLPMLPNTGNPNLMIMMLGLLGSFSIVYGALLALRQ 300  
 Mm FpoM SEAPTAGSILFILLKIGGYGLFRISLPMLPNTGSPQLMIMILGLLGSVSILYGALLALRQ 300  
 Mb FpoM TEAPTAGSVLFILLKIGGYGLFRISLPMLPNTGNPELMTITILGLLGAFSILYGALLALRQ 300  
  
 Ma FpoM KDLKRMIAYSSLSHMGFVTLGSAGLVALSVSGAMFQQF SHGLIMS IMFMSAGAIQT TTTGT 360  
 Mm FpoM KDLKRMIAYSSLSHMGYVILGSAGLVTL SVSGAMFQQF SHGLIMS IMFMSAGAIQT AAGT 360  
 Mb FpoM KDLKRMIAYSSLSHMGYVLLGSAGFVALSVSGAMFQQF SHGLIMS IMFMSAGAIQT STGT 360  
  
 Ma FpoM RIINDLGGLARKMPMLAVLMMVGFMASLGLPGLTGFIAEFLVLTFSFVNLPGFVLLALLA 420  
 Mm FpoM RIINELGGLAKKMPMLTVAMMVGFMASLGLPGLTGFIAEFLVLTFTFTNLPVFVVIALLA 420  
 Mb FpoM RIINN LGGLAKKMP TLAVLMM LGFMASLGLPGLTGFIAEFLVLAFSYVNLPGFVLLALLA 420  
  
 Ma FpoM IVITAGYHLWAMQRAMFGVYNEKLG SIRDINSMQVFSMGVIALLVLYFGLNPSVPLNMMI 480  
 Mm FpoM IVVTAGYHLWAMQRAMFGVYNEKLG DVRDINSIQVFSMAVIALLVLYFGLNPSVPLDMMI 480  
 Mb FpoM IVITAGYHLWAMQRAMFGVYNEKLG DVRDINSLQVFSMAVIALLVVYFGWNPVPLNMMI 480  
  
 Ma FpoM KNSEAIVSLAAMGV 495  
 Mm FpoM NNSEAIVSLAAGMV 495  
 Mb FpoM TNSEAIVSLAAALGV 495

### 13. FpoN

Ma FpoN MDELMYLAPEIVVVATGLVLLAGVFLSPRAKNILGYLATLGLILAAFLTVKSFGLLTMQ 60  
 Mm FpoN MQEIMYLAPELVLVATGLVILLTG VFLSPQSKNILGYLATLGLTAAIFLTVKSFGLLTME 60  
 Mb FpoN MENLMFLAPEIAIAATGLIILFIGVFMSRRTKNVLGYLATLGLILAAVLTIQSFG----- 55  
  
 Ma FpoN GFQVGYSIFSEALNIDALSQFFKLVFLVVALIVSIAAIKYNENS DHT EEFYTLMLFATFG 120  
 Mm FpoN GFSVQYTI FSETLS IDALSQFFKLVFLAVALIVS IASIKYTENS DHT EEFYTLVLFATFG 120  
 Mb FpoN ---TEATMFYGTVS IDALSQFFKLVFLVVALIVS IASIKYNENS DHT EEFYSLVLFATLG 112  
  
 Ma FpoN MMIVASANDLVVLFVAFELASLATYALAGYEKQNPRSLEGAMKYFVIGSVSAALMLFGLS 180  
 Mm FpoN MMIVASANDLILFCAFELASLATFALAGFEKQNARSLEGAMKYFVIGSVSAALMLFGLS 180  
 Mb FpoN MMVASSNDFILFCAFELASFATYALAGFEKQNPRSLEGAMKYFMMGAVSSALMLFGIS 172  
  
 Ma FpoN FVYGATGTTSIPLIAANPGLLIENPIGLVAVVLLIAGFGFKMALVPPHFWAPD TYQGS PS 240  
 Mm FpoN FVYGATGTTSIPLIAQN PGLLTGNPIGIVAIVLLTAGFGFKMALVPPHFWAPD TYQGS PS 240  
 Mb FpoN FVYGATGTTSIPMIAENVSLAENPIGLVAVVLLIAGFGFKMALVPPHFWAPD TYQGS PS 232  
  
 Ma FpoN VVSALLAAGSKKMGFVAAFRIFIVALVALQPDWQFIFTILAVATMTFGNIVAVAQTSVKR 300  
 Mm FpoN VVSALLAAGSKKMGFVAAFRVFI IALAALQPDWQFMFTLLAVVTMTFGNVVAVAQTSVKR 300  
 Mb FpoN VVSLLAAGSKKMGFVAAFRVFI LALAALQPDWQFAFTILAVVTMTFGNVVAVSQT SVKR 292  
  
 Ma FpoN MLAYSSVAQAGYIAMAFAVMT PVALGGGIMYALAHAFMKAGAFIAAGV VVWVMSQEKTGN 360  
 Mm FpoN MLAYSSLAQAGYIAMAFAVMT PVALAGGIMYTLAHAFMKAGAFIAAAV VVWMITSEKTGN 360  
 Mb FpoN MLAYSSLAQAGYIAMAFAVMT PMALTGGIFYT LAHAFMKGGAFIAAGV VVWMITTQRTGD 352

Fig. 53. Continued.

Ma FpoN LDVDPHLDSEFKGLGKRMPPLAALSMTVFVFALAGIPPTAGFMAKFVLFSSSTIQAGMAWLAV 420  
 Mm FpoN LDIPDHLDSEFRGLGKRMPPLAALCMTVFVFALAGIPPTAGFMAKFVLFSSSTIQAGMTWLAV 420  
 Mb FpoN LQVPDHLDNFRGLGKRMPPLVALCMTVFVFALAGIPLTSGFMAKFVLFSSSTIQAGMTWLAV 412  
  
 Ma FpoN IAILNSALSIFYARLVRYMYFLPPEGK--SVSVFPFYAAALLVAVAGVLMGIWPEPFV 478  
 Mm FpoN IAILNSALSIFYARLVKYMYPPEGKTEKVSIPFPFYAAALLVAVAGVLMGLWPEPFV 480  
 Mb FpoN IAILNSALSIFYARLVRYMYFLPPKGG--KIGLFPFYAAALLLATAGVLMGLWPEPFL 470  
  
 Ma FpoN ELAMKAAMVLV-- 489  
 Mm FpoN ELAMKAAMVLVVF 493  
 Mb FpoN QWAMEAAKVLII-- 481

## 14. FpoO

Ma FpoO1 MTDCDLGKAIPTVIPVRVIRPLLKFAYPNGVWVWGLCETCLDSAQKTYLEVNKNQPSCRK 60  
 Mm FpoO MTDCDLGKGIPTVIPVRTYPPLLRKFAYPEGVWVWGLCETCLDSAQKTYLEVNRNHTSCR 60  
 Mb FpoO MTDCDLGCRALPSVIPVRVFRSRLKFAYPEGIWKGLCEACLDSAQETLYSINKDEISCR 60  
  
 Ma FpoO1 GKCALCGDKTGVFPVELQVPDFSKGIVKDVLDLYRCLKGVDEAYIRHKKEQIEMEH--- 117  
 Mm FpoO GKCSLCSKKTGVFSVELQIPDFSKGIVRVDVLYRCLKLVDEAYIRYKREQIEQDHEQG 120  
 Mb FpoO NKCVLCSGKGRVYPVEIQIPDFSKGVVKKVNVCTKCLDSINETYIRFKREQIEGSVCE- 119  
  
 Ma FpoO1 ---GYH----- 120  
 Mm FpoO RIHGHEHVPH 131  
 Mb FpoO --HGNGVPEH 128

## 15. FpoO1/O2

Ma FpoO1 MTDCDLGKAIPTVIPVRVIRPLLKFAYPNGVWVWGLCETCLDSAQKTYLEVNKNQPSCRK 60  
 Ma FpoO2 MSLLNPK----PDCILVRVVRPLLKFAYPNGVWVWGLCETCLDSAQKTYLEANKNQPSCRK 56  
  
 Ma FpoO1 GKCALCGDKTGVFPVELQVPDFSKGIVKDVLDLYRCLKGVDEAYIRHKKEQIEMEHGYH 120  
 Ma FpoO2 GKCALCGDKTGVFSVELQVPDFVLF----- 81

Fig. S3. Continued.

## A. *mer/fpoF* intergenic region

```

MmfpoFup      TAAATTTTATTACATCTTGCATAATCATTTTTTTTTACGTTATATTTTTTAAAA----- 52
MafpoFup      TAAATTTTATTACATCTTGCATAATCATTTTTTTTTACGTTATATTTTTTAAAA----- 52
MbfpoFup      TAAGTTT-ATTACATCCTGCATAAATTTTTTTAATTCATTGATTTTTTTAATTTTTTATTT 59

MmfpoFup      -ACTTTTAAAAAACATCTTGCCGTTAAGGCAAGCTTATCGAGGCATTGGAGGTAAGTGA 118
MafpoFup      -ACTTTTAAAAAACATCTTGCCGTTAAGGCAAGCTTATCGAGGCATTGGAGGTAAGTGA 118
MbfpoFup      TATTTTTAAAAAACATCTTGCCGTTAAGGCAAGCTTATCGAGGCATTGGAGGTAAGTGA 119

MmfpoFup      TG 120
MafpoFup      TG 120
MbfpoFup      TG 121

```

## B. *fpoF*/downstream orf intergenic region

```

MmfpoFdn      TGAAGTCCGAAACTTAATTTAAATTCAAAACTTAATTTAAATCCGAAACTTAATTCAAAA 60
MafpoFdn      TGAGACCAGAAGATATATCCAGAT-----ATATCCAAAA-----A 35
MbfpoFdn      TGAATCAGAA--TATATCGAGAAT-----AAAT----AA----- 29

MmfpoFdn      AAGAAATATGGTACATTCGAGGTTGGA-TAC--GATG 94
MafpoFdn      GATAACCAGTACAAATTCGAGGTTGGA-TCCGGGATG 71
MbfpoFdn      --TAAATGTATT--GTTGGAGGTTGAAATACGGGATG 62

```

Fig. S4. Alignment of regions flanking *fpoF*. ClustalW was used to align the intergenic region between the methylenetetrahydroscarinapterin reductase gene (*mer*) and *fpoF* (*fpoFup*) (A) and between *fpoF* and putative cytidyltransferase gene (*fpoFdn*) (B). Green bases denote conserved amino acid residues. The annotated start and stop codons of genes are in red. The putative ribosome binding sites are in blue. Mb, *M. barkeri*; Mm, *M. mazei*; Ma, *M. acetivorans*.

**Table S1. Pairwise percent identities\* of *M. barkeri* (Mb) Fpo, *M. acetivorans* (Ma) Fpo, *M. mazei* (Mm) Fpo<sup>†</sup>, and *E. coli* (Ec) Nuo predicted protein sequences**

|          | Mb FpoF | Ma FpoF  | Mm FpoF  | Ec NuoF |
|----------|---------|----------|----------|---------|
| Mb FpoF  | —       | 86       | 88       | Absent  |
| Ma FpoF  |         | —        | 89       |         |
| Mm FpoF  |         |          | —        |         |
|          | Mb FpoA | Ma FpoA  | Mm FpoA  | Ec NuoA |
| Mb FpoA  | —       | 91       | 92       | 36      |
| Ma FpoA  |         | —        | 99       | 35      |
| Mm FpoA  |         |          | —        | 34      |
|          | Mb FpoB | Ma FpoB  | Mm FpoB  | Ec NuoB |
| Mb FpoB  | —       | 88       | 85       | 37      |
| Ma FpoB  |         | —        | 92       | 38      |
| Mm FpoB  |         |          | —        | 40      |
|          | Mb FpoC | Ma FpoC  | Mm FpoC  | Ec NuoC |
| Mb FpoC  | —       | 82       | 79       | 24      |
| Ma FpoC  |         | —        | 89       | 30      |
| Mm FpoC  |         |          | —        | 20      |
|          | Mb FpoD | Ma FpoD  | Mm FpoD  | Ec NuoD |
| Mb FpoD  | —       | 91       | 83       | 35      |
| Ma FpoD  |         | —        | 90       | 36      |
| Mm FpoD  |         |          | —        | 37      |
|          | Mb FpoH | Ma FpoH  | Mm FpoH  | Ec NuoH |
| Mb FpoH  | —       | 83       | 77       | 38      |
| Ma FpoH  |         | —        | 86       | 39      |
| Mm FpoH  |         |          | —        | 39      |
|          | Mb FpoI | Ma FpoI  | Mm FpoI  | Ec NuoI |
| Mb FpoI  | —       | 85       | 83       | 29      |
| Ma FpoI  |         | —        | 91       | 29      |
| Mm FpoI  |         |          | —        | 20      |
|          | Mb FpoJ | Ma FpoJ  | Mm FpoJ  | EcNuoJ  |
| Mb FpoJ  | —       | 81       | 81       | 21      |
| Ma FpoJ  |         | —        | 88       | 23      |
| Mm FpoJ  |         |          | —        | 21      |
|          | Mb FpoK | Ma FpoK  | Mm FpoK  | Ec NuoK |
| Mb FpoK  | —       | 92       | 90       | 38      |
| Ma FpoK  |         | —        | 97       | 37      |
| Mm FpoK  |         |          | —        | 35      |
|          | Mb FpoL | Ma FpoL  | Mm FpoL  | Ec NuoL |
| Mb FpoL  | —       | 87       | 88       | 34      |
| Ma FpoL  |         | —        | 89       | 33      |
| Mm FpoL  |         |          | —        | 34      |
|          | Mb FpoM | Ma FpoM  | Mm FpoM  | Ec NuoM |
| Mb FpoM  | —       | 88       | 85       | 30      |
| Ma FpoM  |         | —        | 88       | 31      |
| Mm FpoM  |         |          | —        | 30      |
|          | Mb FpoN | Ma FpoN  | Mm FpoN  | Ec NuoN |
| Mb FpoN  | —       | 80       | 81       | 31      |
| Ma FpoN  |         | —        | 88       | 31      |
| Mm FpoN  |         |          | —        | 32      |
|          | Mb FpoO | Ma FpoO1 | Ma FpoO2 | Mm FpoO |
| Mb FpoO  | —       | 63       | 55       | 58      |
| Ma FpoO1 |         | —        | 79       | 80      |
| Ma FpoO2 |         |          | —        | 66      |
| Mm FpoO  |         |          |          | —       |

\*ClustalW was used for determination of percent identity.

<sup>†</sup>Locus tags for genes encoding Fpo subunits are given in Fig. S1.



**Table S2. *M. barkeri* Fusaro strains used in this study**

| Strain | Genotype                                                                     | Source or Construction                                             |
|--------|------------------------------------------------------------------------------|--------------------------------------------------------------------|
| WWM85  | $\Delta hpt::PmcrB-\phi C31int-attP$                                         | (8)                                                                |
| WWM86  | $\Delta hpt::PmcrB-\phi C31int-attB$                                         | (8)                                                                |
| WWM71  | $\Delta hpt::PmcrB-\phi C31int-attB, \Delta fpoA-O$                          | Deletion of <i>fpo</i> by markerless exchange with pDK4 in WWM86   |
| WWM123 | $\Delta hpt::PmcrB-\phi C31int-attP, \Delta fpoF$                            | Deletion of <i>fpoF</i> by markerless exchange with pDK13 in WWM85 |
| WWM116 | $\Delta hpt::PmcrB-\phi C31int-attP, \Delta freAEGB$                         | Deletion of <i>fre</i> by markerless exchange with pGK6 in WWM85   |
| WWM122 | $\Delta hpt::PmcrB-\phi C31int-attB, \Delta frhADGB::pac-hpt$                | Deletion of <i>frh</i> with Apal/NotI-digested pAMG81 in WWM86     |
| WWM108 | $\Delta hpt::PmcrB-\phi C31int-attB, \Delta fpoA-O, \Delta frhADGB::pac-hpt$ | Deletion of <i>frh</i> with Apal/NotI-digested pAMG81 in WWM71     |
| WWM145 | $\Delta hpt::PmcrB-\phi C31int-attP, \Delta fpoF, \Delta frhADGB::pac-hpt$   | Deletion of <i>frh</i> with Apal/NotI-digested pAMG81 in WWM123    |

**Table S3. Plasmids used in this study**

| Plasmid | Description and/or Construction                                                                                                                                                                                                                                                                    | Reference  |
|---------|----------------------------------------------------------------------------------------------------------------------------------------------------------------------------------------------------------------------------------------------------------------------------------------------------|------------|
| pMP44   | Vector containing a <i>pac-hpt</i> cassette used to delete genes from <i>M. barkeri Fusaro</i> chromosome using the markerless exchange method                                                                                                                                                     | (7)        |
| pDK4    | <i>SpeI/XmaI</i> -digested <i>fpo</i> upstream PCR product amplified using primers LfpoA and RfpoA1 and <i>NotI/XmaI</i> -digested <i>fpo</i> downstream PCR product amplified using primers LfpoO and RfpoO were ligated to <i>SpeI/NotI</i> -digested pMP44                                      | This study |
| pDK13   | <i>SpeI/XmaI</i> -digested <i>fpoF</i> upstream PCR product amplified using primers FusfpoF(us)for and FusfpoF(us)rev and <i>NotI/XmaI</i> -digested <i>fpoF</i> downstream PCR product amplified using primers FusfpoF(ds)for and FusfpoF(ds)rev were ligated to <i>SpeI/NotI</i> -digested pMP44 | This study |
| pGK6    | <i>AscI/PstI</i> -digested <i>fre</i> upstream and downstream fusion PCR product amplified using primers freupfor, freuprev, frednfor, and frednrev and ligated to <i>MluI/NsiI</i> -digested pMP44                                                                                                | This study |
| pJK301  | Vector containing a <i>pac-hpt</i> cassette used to delete genes from <i>M. barkeri Fusaro</i> chromosome using double-homologous recombination-mediated gene replacement method                                                                                                                   | (14)       |
| pAMG78  | <i>Apal/XhoI</i> -digested <i>frh</i> upstream PCR product amplified using primers Fusfrhupfor and Fusfrhuprev and ligated to <i>Apal/XhoI</i> -digested pJK301                                                                                                                                    | This study |
| pAMG81  | <i>SpeI/NotI</i> -digested <i>frh</i> downstream PCR product amplified using primers Fusfrhdnfor and Fusfrhdnrev and ligated to <i>SpeI/NotI</i> -digested pAMG78                                                                                                                                  | This study |

**Table S4. Primers used in this study**

| Primer         | Sequence*                                          | Added Sites         |
|----------------|----------------------------------------------------|---------------------|
| LfpoA          | <u>ACTAGTGAAGTGAACCCTCGCCTTT</u>                   | SpeI                |
| RfpoA1         | <u>GGATCCCCGGGCATATGTATCACCTATTAAGTGCAGC</u>       | BamHI/XmaI/NdeI     |
| LfpoO          | <u>AAGCTTCCCGGGTGAATTTGAGTAAAGCTGCATTTTG</u>       | HindIII/XmaI        |
| RfpoO          | <u>CTCGAGGGCGCCGCCCTACTAATGTTGGCATTGACG</u>        | XhoI/NotI           |
| FusfpoF(us)for | <u>GGCGGCCACTAGTGAATCGAATTTGTGCCGAGCGA</u>         | AscI/SpeI           |
| FusfpoF(us)rev | <u>GGCGGCCCCCCGGTTAGTTACCTCCAACACCTT</u>           | AscI/XmaI           |
| FusfpoF(ds)for | <u>GGCGGCCCCCCGGGAATCAGAATATATCGAGAATAA</u>        | AscI/XmaI           |
| FusfpoF(ds)rev | <u>GGCGGCCCGCGCCGCTTTTTAAATCCGATTTTCAC</u>         | AscI/NotI           |
| freupfor       | <u>GGCGGCCAAATCCGATGCATTCTCTGC</u>                 | AscI                |
| freuprev       | CAGTGTAATAACAAAATAGTTTTTCGCTGCCTCGTTTTCTATTTGGTG   | None                |
| frednfor       | CACCAAATAGAAAACGAGGCAGCGAAAAACTATTTTGTTATTTACTCTG  | None                |
| frednrev       | <u>GGCGGCCCTGCAGCCCGTAAACCATCCAACATC</u>           | AscI/PstI           |
| Fusfrhupfor    | <u>GGCGGCCCTTAAGGGGCCCTCCGTTGTCCTTTTCCAC</u>       | AscI/AflIII/ApaI    |
| Fusfrhuprev    | <u>GGCGGCCACTAGTCTCGAGCAATTGTATGCCTCGTTTTCGATT</u> | AscI/SpeI/XhoI/MfeI |
| Fusfrhdnfor    | <u>GGCGGCCCGCGCCGCTGTTGCGAGTTGTTCAATCC</u>         | AscI/NotI           |
| QPCRrpoA1for   | GGCTTCGCTGCAAGACATG                                | None                |
| QPCRrpoA1rev   | CCCGAAGTGTCAGGACATT                                | None                |
| QPCRfpofor     | CCTTCTCCGAAATGGGTTCATC                             | None                |
| QPCRfporev     | AAACGGGCCGCACTAA                                   | None                |

\*The added restriction sites are underlined.
